# Supplementary material for: Fabrication and characterization of TPGS-modified chlorogenic acid liposomes and its bioavailability in rats
Source: Royal Society of Chemistry journal article supplement (doi:10.1039/d4ra04116j), 2024-01-01
Supplement: d4ra04116j1.pdf [file d4ra04116j1.pdf]

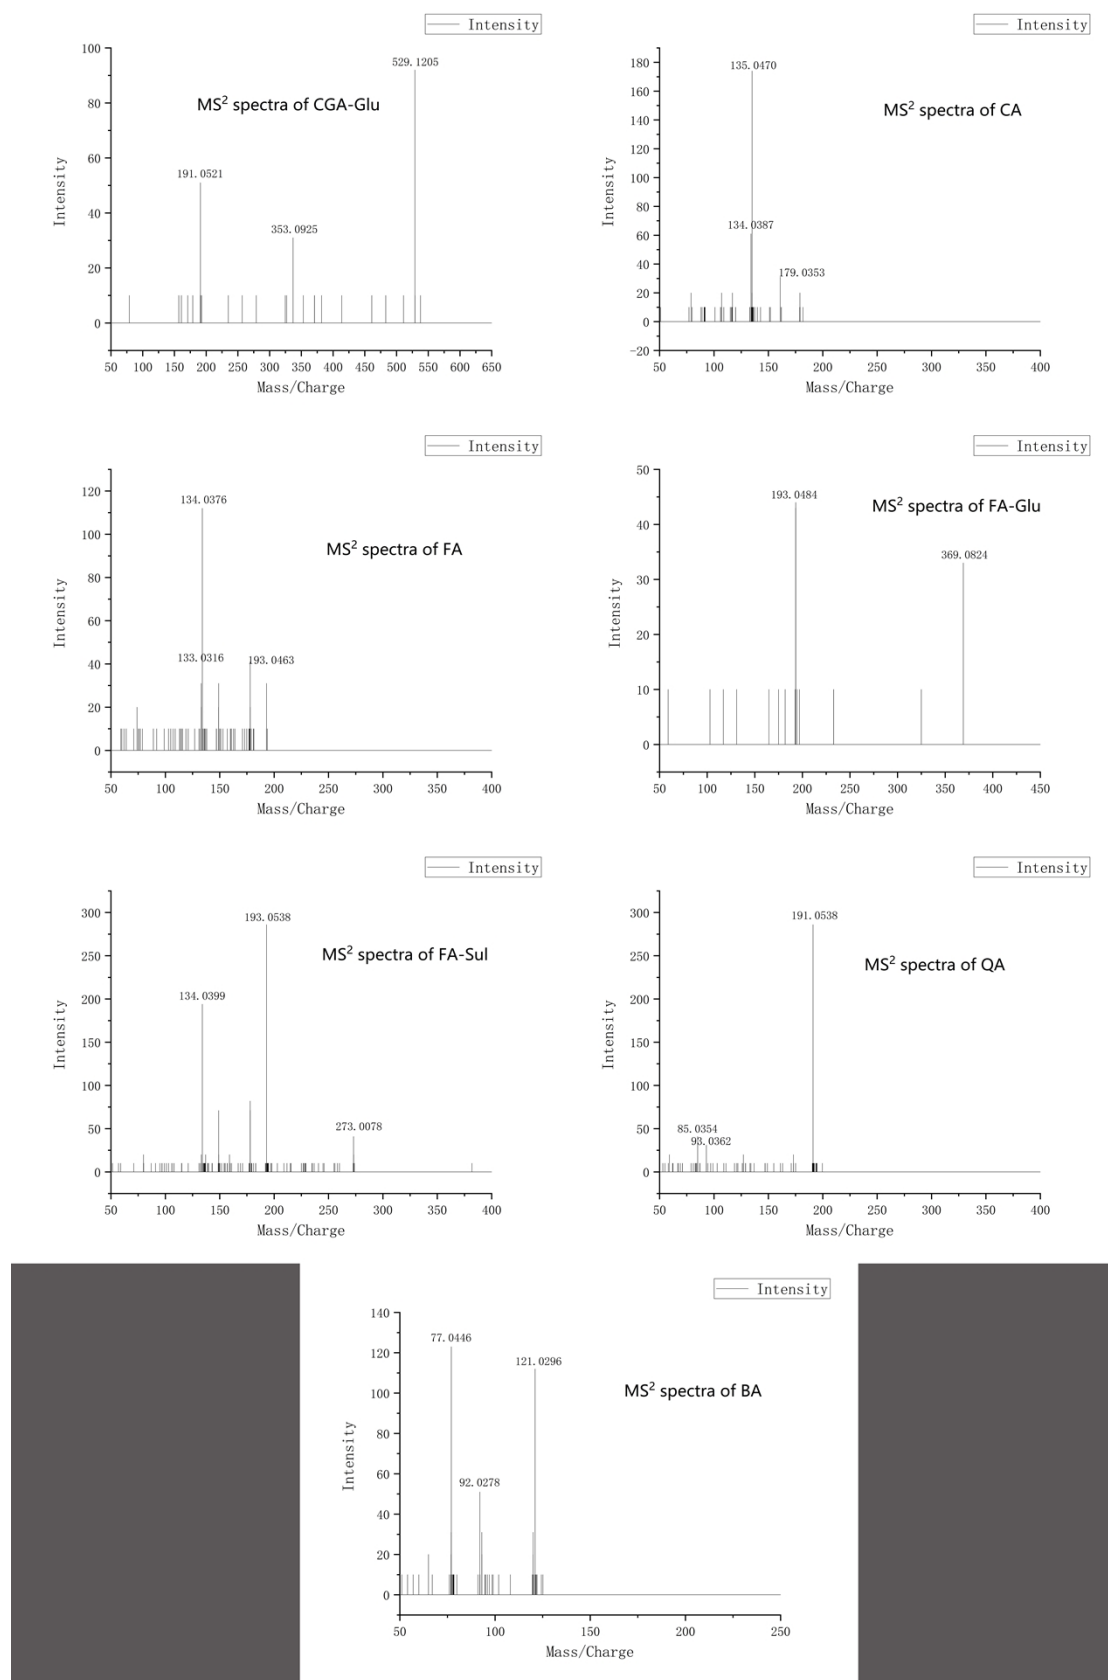

Fig. 1. The MS<sup>2</sup> spectra of these metabolites of CGA in plasma obtained by UPLC-QTOF-MS

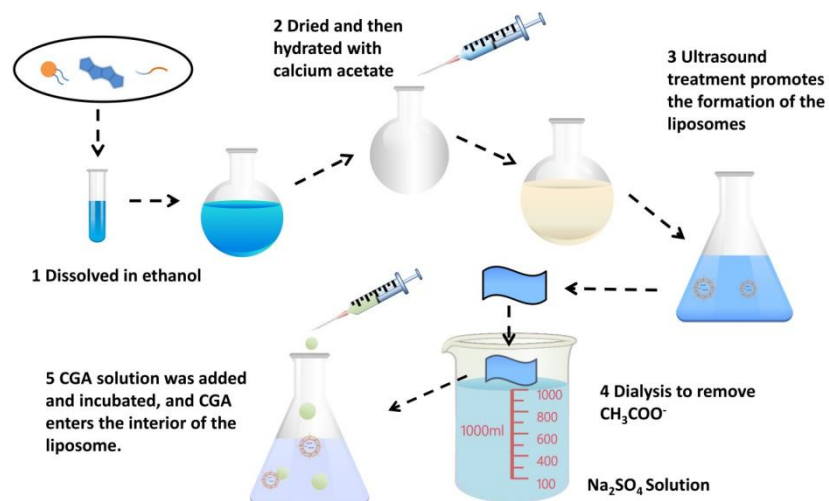

Fig. 2 Schematic diagram of CGAs liposome preparation process.

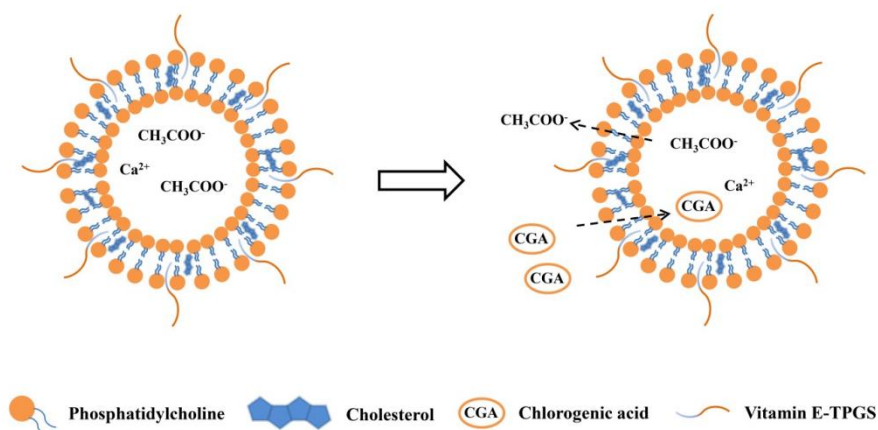

Fig. 3 The process of CGAs wrapping using the active wrapping method.

Table 1 Comparison of encapsulation rates between normal liposomes and TPGS-modified liposomes.

|              | EE (%)     | LE (%)     |
|--------------|------------|------------|
| CGAs-TPGS-LP | 83.22±0.11 | 11.21±0.02 |
| CGAs-LP      | 51.34±0.32 | 8.70±0.23  |
